# Supplementary material
Source: HighWire-hosted journal article supplement (http://www.qdcxjkg.com/highwire/filestream/121535/field_highwire_adjunct_files/1/ERJ-01391-2014_Table_S2.pdf)
Supplement: ERJ-01391-2014_Table_S2.pdf [file ERJ-01391-2014_Table_S2.pdf]

**TABLE S2** Baseline Comorbidities according to Charlson Comorbidity Index

| <b>Comorbidities</b>             | <b>n</b> | <b>%</b> |
|----------------------------------|----------|----------|
|                                  | 16016    |          |
| COPD only                        | 6026     | 37.6     |
| AIDS                             | 33       | 0.2      |
| cerebrovascular disease          | 1464     | 9.1      |
| chronic pulmonary disease        | 3328     | 20.8     |
| congestive heart failure         | 3199     | 20.0     |
| connective tissue disease        | 342      | 2.1      |
| dementia                         | 526      | 3.3      |
| diabetes                         | 3181     | 19.9     |
| diabetes with end organ damage   | 299      | 1.9      |
| heart diseases                   | 4700     | 29.3     |
| hemiplegia                       | 102      | 0.6      |
| leukemia                         | 68       | 0.4      |
| liver disease mild               | 432      | 2.7      |
| liver disease moderate or severe | 215      | 1.3      |
| liver diseases                   | 647      | 4.0      |
| malignant lymphoma               | 66       | 0.4      |
| metastatic solid malignancy      | 149      | 0.9      |
| myocardial infarction            | 2115     | 13.2     |
| neoplasms                        | 1950     | 12.2     |
| neurological diseases            | 1851     | 11.6     |
| peripheral vascular disease      | 1663     | 10.4     |
| renal disease moderate or severe | 902      | 5.6      |
| tumor (any)                      | 1716     | 10.7     |
| ulcer disease                    | 1006     | 6.3      |
